# Supplementary material for: Identification of Key Prognostic Genes of Triple Negative Breast Cancer by LASSO-Based Machine Learning and Bioinformatics Analysis
Source: MDPI journal article supplement (doi:10.3390/genes13050902), 2022-05-18
Supplement: s1 [file s1]

**Supplementary Table S1.** The demographic information of the 229 samples.

| Total (n=229)             | TNBC (n=116) | Normal (n=113) | <i>p</i> -value |
|---------------------------|--------------|----------------|-----------------|
|                           | n(%)         | n(%)           |                 |
| <b>Age,years</b>          |              |                | 0.1151          |
| <51                       | 46 (39.7)    | 41 (36.3)      |                 |
| 51-70                     | 57 (49.1)    | 50 (44.2)      |                 |
| 70<                       | 13 (11.2)    | 22 (19.5)      |                 |
| <b>Race</b>               |              |                |                 |
| Asia                      | 8 (7)        | 1 (1.0)        |                 |
| Black or african american | 32 (27.6)    | 6 (5.0)        |                 |
| White                     | 69 (59.4)    | 105 (93.0)     |                 |
| Not reported              | 7 (6)        | 1 (1.0)        |                 |
| <b>Pathologic stage</b>   |              |                |                 |
| StageI                    | 19 (16.4)    |                |                 |
| StageII                   | 73 (63.9)    |                |                 |
| Stage III                 | 19 (16.4)    |                |                 |
| Stage IV                  | 2 (1.7)      |                |                 |
| Not reported              | 3 (2.5)      |                |                 |
| <b>Metastasis</b>         |              |                |                 |
| M0                        | 99 (85.3)    |                |                 |
| M1                        | 2 (1.7)      |                |                 |
| Mx                        | 15 (13.0)    |                |                 |
| <b>Lymph Node</b>         |              |                |                 |
| N0                        | 74 (63.8)    |                |                 |
| N1                        | 26 (22.4)    |                |                 |
| N2                        | 12 (10.3)    |                |                 |
| N3                        | 4 (3.5)      |                |                 |
| <b>T stage</b>            |              |                |                 |
| T1                        | 26 (22.4)    |                |                 |
| T2                        | 74 (63.8)    |                |                 |
| T3                        | 12 (12.3)    |                |                 |
| T4                        | 4 (3.5)      |                |                 |
